# Supplementary material
Source: publisher figshare collection journal article supplement (https://acs.figshare.com/ndownloader/files/8670469)
Supplement: Supplementary file 1 [file 8670469]

## Supporting Information

Manuscript title:

**Solution-based Fabrication of Poly-crystalline Si Thin Film Transistors from Recycled Polysilanes**

Authors list:

**Paolo M. Sberna<sup>\*1</sup>, Miki Trifunovic<sup>2</sup>, Ryoichi Ishihara<sup>3</sup>**

Authors Affiliations:

<sup>1</sup> **Quantum Engineering Department, Delft University of Technology, Mekelweg 4, 2628 CD Delft, The Netherlands**

<sup>2</sup> **QuTech, Delft University of Technology, Mekelweg 4, 2628 CD Delft, The Netherlands**

<sup>3</sup> **QuTech and Kavli Institute of Nanoscience, Delft University of Technology, Mekelweg 4, 2628 CD Delft, The Netherlands**

Number of SI pages: 3

Number of SI figures: 4

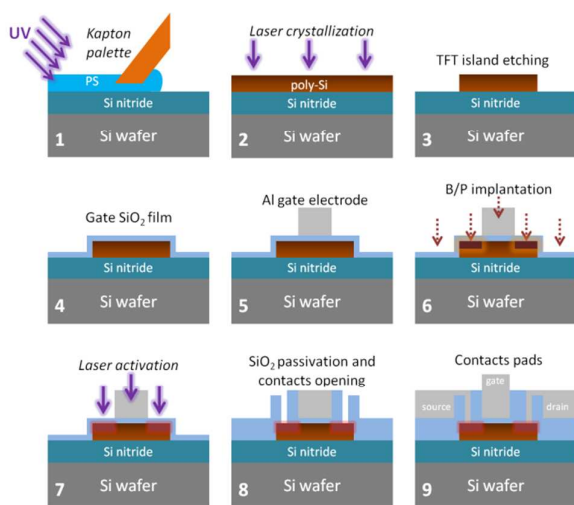

Figure SI 1. TFT fabrication steps. 1) PS spreading by soft palette on substrate under UV irradiation; 2) RT excimer laser crystallization; 3) poly-Si island photolithographic definition and dry etching; 4) 60 nm SiO<sub>2</sub> PE-CVD deposition for gate dielectric; 5) 900 nm Al gate electrode deposition and dry etching; 6) boron (for p-channel) and phosphorus (for n-channel) ion deposition and dry etching; 7) laser activation; 8) SiO<sub>2</sub> passivation and contacts opening; 9) Contacts pads.

implantation; 7) RT excimer laser dopants electrical activation; 8) 800 nm SiO<sub>2</sub> PE-CVD deposition and contacts opening by oxide dry and wet etching; 9) Al deposition for contact pads.

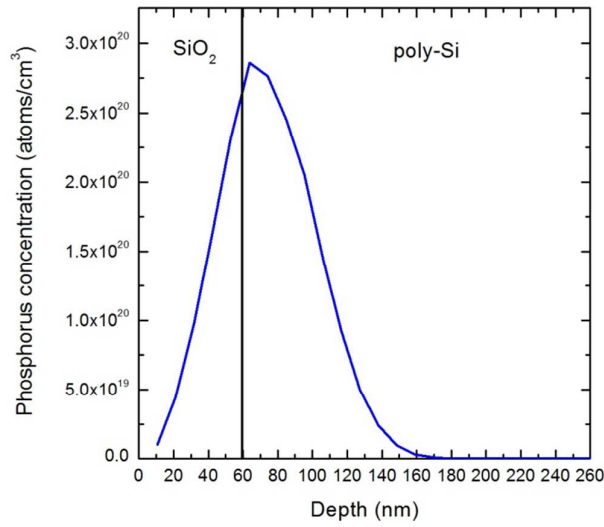

Figure SI 2. Phosphorus ions concentration profile calculated by SRIM-2008 (P ions energy = 50 keV, dose =  $2 \cdot 10^{15}$  atoms/cm<sup>2</sup>, incidence angle = 7°, SiO<sub>2</sub> density = 2.33 cm<sup>-3</sup>, poly-Si density = 2.32 cm<sup>-3</sup>).

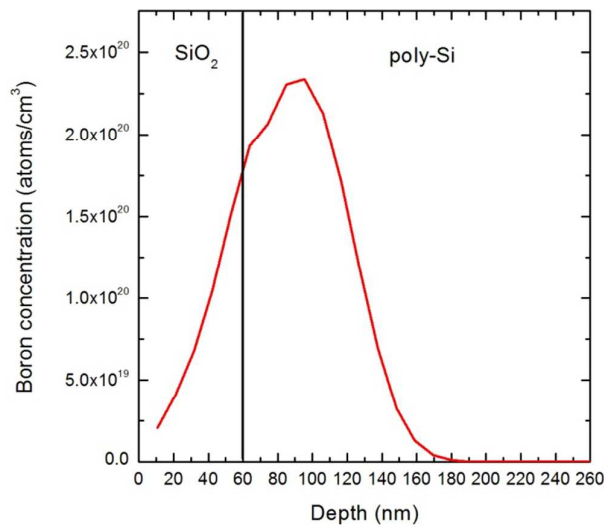

Figure SI 3. Boron ions concentration profile calculated by SRIM-2008 (B ions energy = 20 keV, dose =  $2 \cdot 10^{15}$  atoms/cm<sup>2</sup>, incidence angle = 7°, SiO<sub>2</sub> density = 2.33 cm<sup>-3</sup>, poly-Si density = 2.32 cm<sup>-3</sup>

3

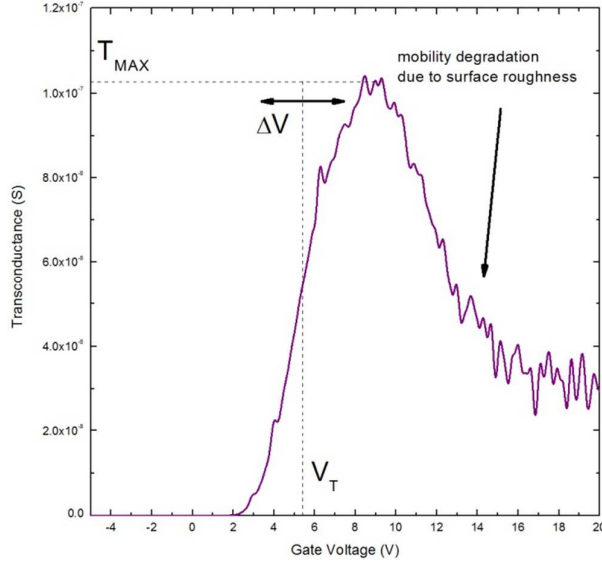

Figure SI 4. Transconductance  $T$  as a function of gate voltage  $V_g$  for n-channel TFT with  $W/L=2$ .

According to Sameshima et al.<sup>13</sup>, the threshold voltage  $V_T$  is defined as  $V_g$  at  $T = T_{MAX}$ .  $\Delta V$  is defined as  $T_{MAX}(\partial T / \partial V_g|_{V_g=V_T})^{-1}$ . Moreover, the areal density of defects states  $N$ , which are occupied when  $V_g = V_T$ , is equal to  $C/e \cdot (V_T - \Delta V/8)$ , where  $C$  and  $e$  are respectively the gate oxide capacitance per unit area and the elementary charge.

In this work, the lower bound of the density of defects states have been assumed equal to  $N$ , while their position within the band-gap have been guessed from the simulations of Sameshima et al.<sup>13</sup>
